# Supplementary material
Source: publisher figshare collection journal article supplement (https://tandf.figshare.com/articles/dataset/_/22894714)
Supplement: Supplementary file 2 [file 1]

# Supplement 2

## 1. Virtual Microscope Home Page

<https://alsdo.canterbury.ac.nz/SEE/GEOL242/slide%20list/>

## 2. VMD: Multichoice Questions and End of Igneous Module

<https://alsdo.canterbury.ac.nz/SEE/GEOL242/Lab5Textures/CROverview.html>

## 3. VMD: Twinning, Disequilibrium Textures, Weird Extinctions, Alterations, Misc

<https://alsdo.canterbury.ac.nz/SEE/GEOL242/Lab3Textures/Extinctions.html>

## 4. VMD: Identifying Metamorphic Textures

<https://alsdo.canterbury.ac.nz/SEE/GEOL242/Lab10Textures/CG.html>
